# Supplementary material
Source: PubMed Central journal article supplement (PMC9122523)
Supplement: sj-pdf-1-jcb-10.1177_0271678X211028496.pdf [file sj-pdf-1-jcb-10.1177_0271678X211028496.pdf]

**Isolation and Identification of Leukocyte Populations in Intracranial Blood Collected During Mechanical Thrombectomy**

**Supplemental Information**

Benjamin C. Shaw, MS<sup>1</sup>, G. Benton Maglinger, MS<sup>2</sup>, Thomas Ujas, BS<sup>2</sup>, Chintan Rupareliya, MD<sup>3,6</sup>, Justin F. Fraser, MD<sup>3,6</sup>, Stephen Grupke, MD<sup>3,4</sup>, Melissa Kesler, MD<sup>7</sup>, Mathias Gelderblom, MD<sup>8</sup>, Keith R. Pennypacker, PhD<sup>2,5,6</sup>, Jadwiga Turchan-Cholewo, PhD<sup>1,5</sup>, Ann M. Stowe, PhD<sup>1,2,5,6</sup>

<sup>1</sup>Sanders-Brown Center on Aging, <sup>2</sup>Department of Neurology, <sup>3</sup>Department of Neurosurgery, <sup>4</sup>Department of Radiology, <sup>5</sup>Department of Neuroscience, <sup>6</sup>Center for Advanced Translational Stroke Science, <sup>7</sup>Department of Pathology and Laboratory Medicine, University of Kentucky, Lexington, Kentucky, USA, <sup>8</sup>Department of Neurology, University Hospital Hamburg Eppendorf, Hamburg, Germany

**Correspondence to:**

Ann Stowe, PhD  
Department of Neurology, BBSRB 379  
741 S. Limestone St., Lexington, KY USA 40508  
Phone: 01-859-323-8420  
e-mail: [ann.stowe@uky.edu](mailto:ann.stowe@uky.edu)  
ORCID iD: 0000-0001-8111-4429

**Supplementary Table 1: Freezing medium composition.**

| <b>Cryopreservation Medium A<br/>(Human Serum)</b> | <b>Cryopreservation Medium B<br/>(DMSO)</b> |
|----------------------------------------------------|---------------------------------------------|
| 2.5 ml RPMI 1640                                   | 10 ml RPMI 1640                             |
| 10 ml Heat Inactivated Human AB Serum              | 2.5 ml DMSO                                 |
| 7.5 $\mu$ l 1M HEPES Buffer                        | 100 $\mu$ l 1M HEPES Buffer                 |
| 75 $\mu$ l L-Glutamine                             | 100 $\mu$ l L-Glutamine                     |
| ~12.5 ml                                           | ~12.5 ml                                    |

**Supplementary Table 2: Antibody catalog numbers and conjugates.**

| Target                          | Clone     | Conjugate | Catalog number         |
|---------------------------------|-----------|-----------|------------------------|
| General Immunophenotyping Panel |           |           |                        |
| CD3                             | UCHT1     | BV480     | BD Horizon #566105     |
| CD4                             | M-T477    | BUV396    | BD Biosciences #742738 |
| CD8                             | RPA-T8    | BV650     | BD Biosciences #563821 |
| CD11b                           | ICRF44    | BB515     | BD Horizon #564517     |
| CD11c                           | B-ly6     | BUV661    | BD Horizon #812987     |
| CD14                            | M5E2      | BUV737    | BD Horizon #612783     |
| CD19                            | HIB19     | PE-Cy7    | TONBO #60-0199-T100    |
| CD45                            | HI30      | BUV805    | BD Horizon #612891     |
| CD66b                           | G10F5     | BV421     | BD Horizon #562940     |
| CD138                           | MI15      | BV711     | BD Horizon #583184     |
| CXCR3                           | 1C6/CXCR3 | BUV496    | BD Biosciences #741178 |
| CD161                           | HP-3G10   | PE        | TONBO #50-1619-T100    |
| Ghost Dye (viability)           | N/A       | Red 780   | TONBO #13-0865-T100    |
| Supplemental Panel              |           |           |                        |
| CD31                            | MBC78.2   | BUV563    | BD Biosciences #748916 |
| CD41a                           | HIP8      | APC       | BD Pharmingen #559777  |
| CD45                            | HI30      | BUV805    | BD Horizon #612891     |
| Ghost Dye (viability)           | N/A       | Red 780   | TONBO #13-0865-T100    |

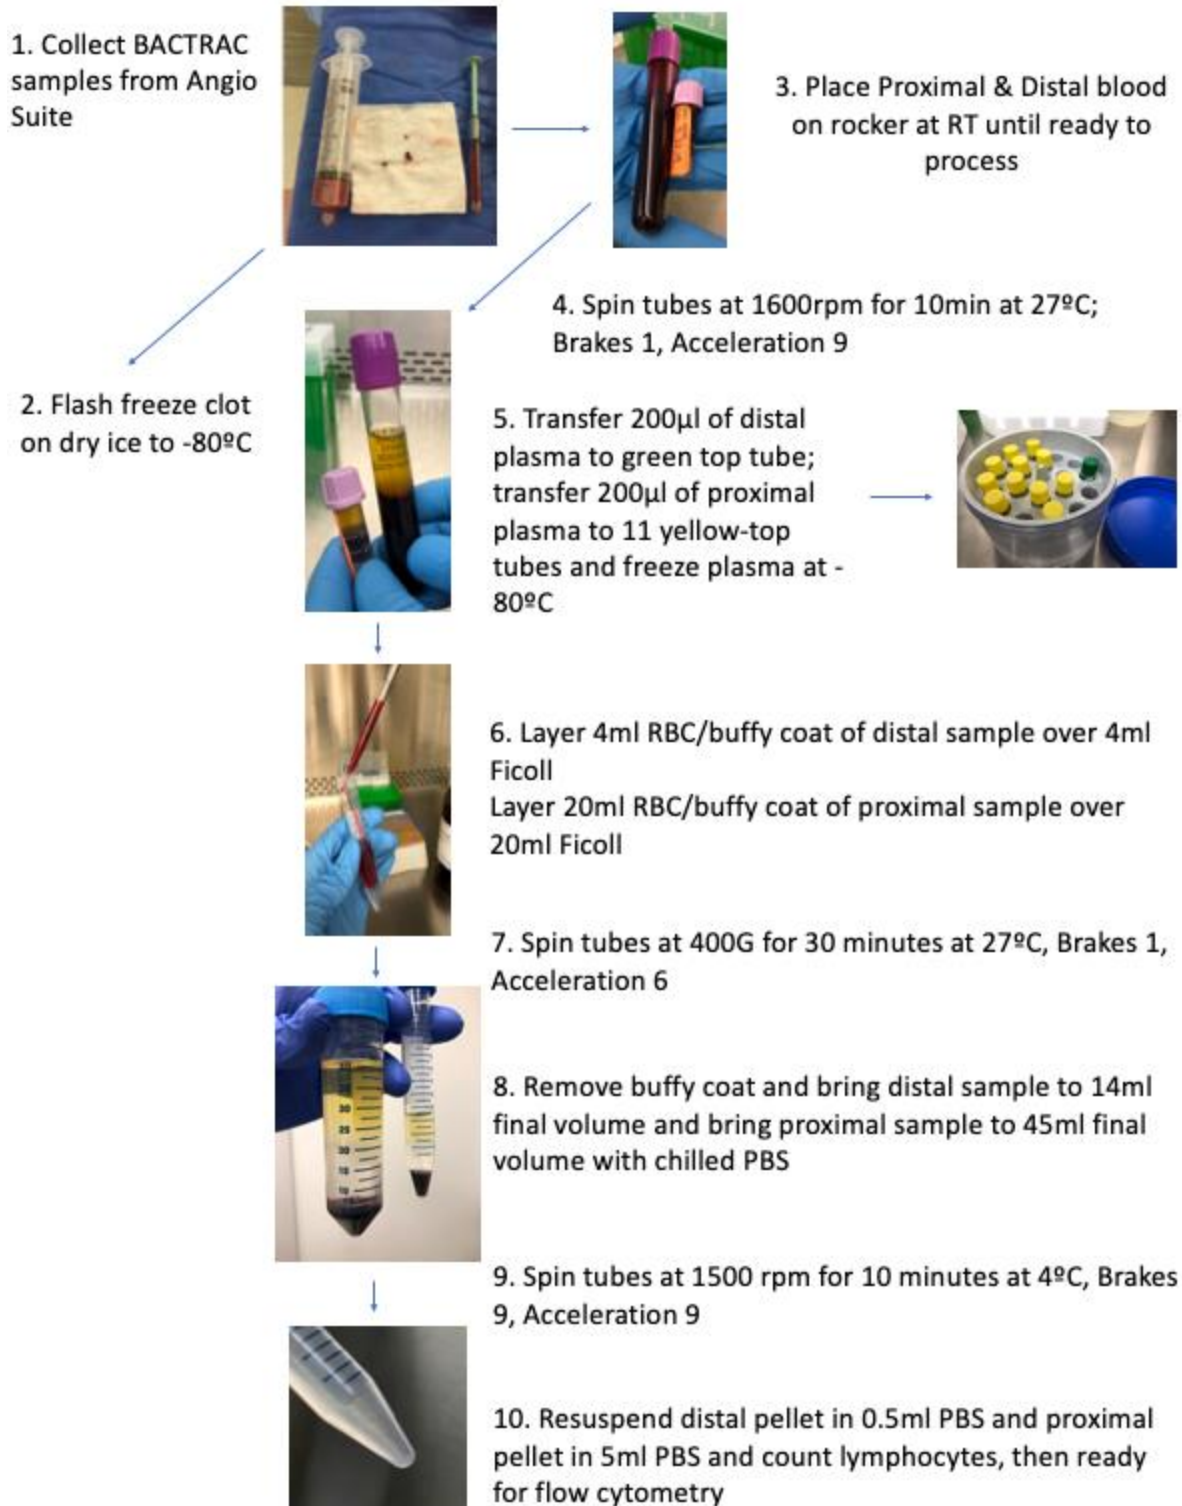

**Supplementary Figure 1: BACTRAC sample collection protocol.** Flowchart describing the original Blood and Clot Thrombectomy Registry and Collaboration (BACTRAC) protocol with our modifications for small sample volume lymphocyte isolation.

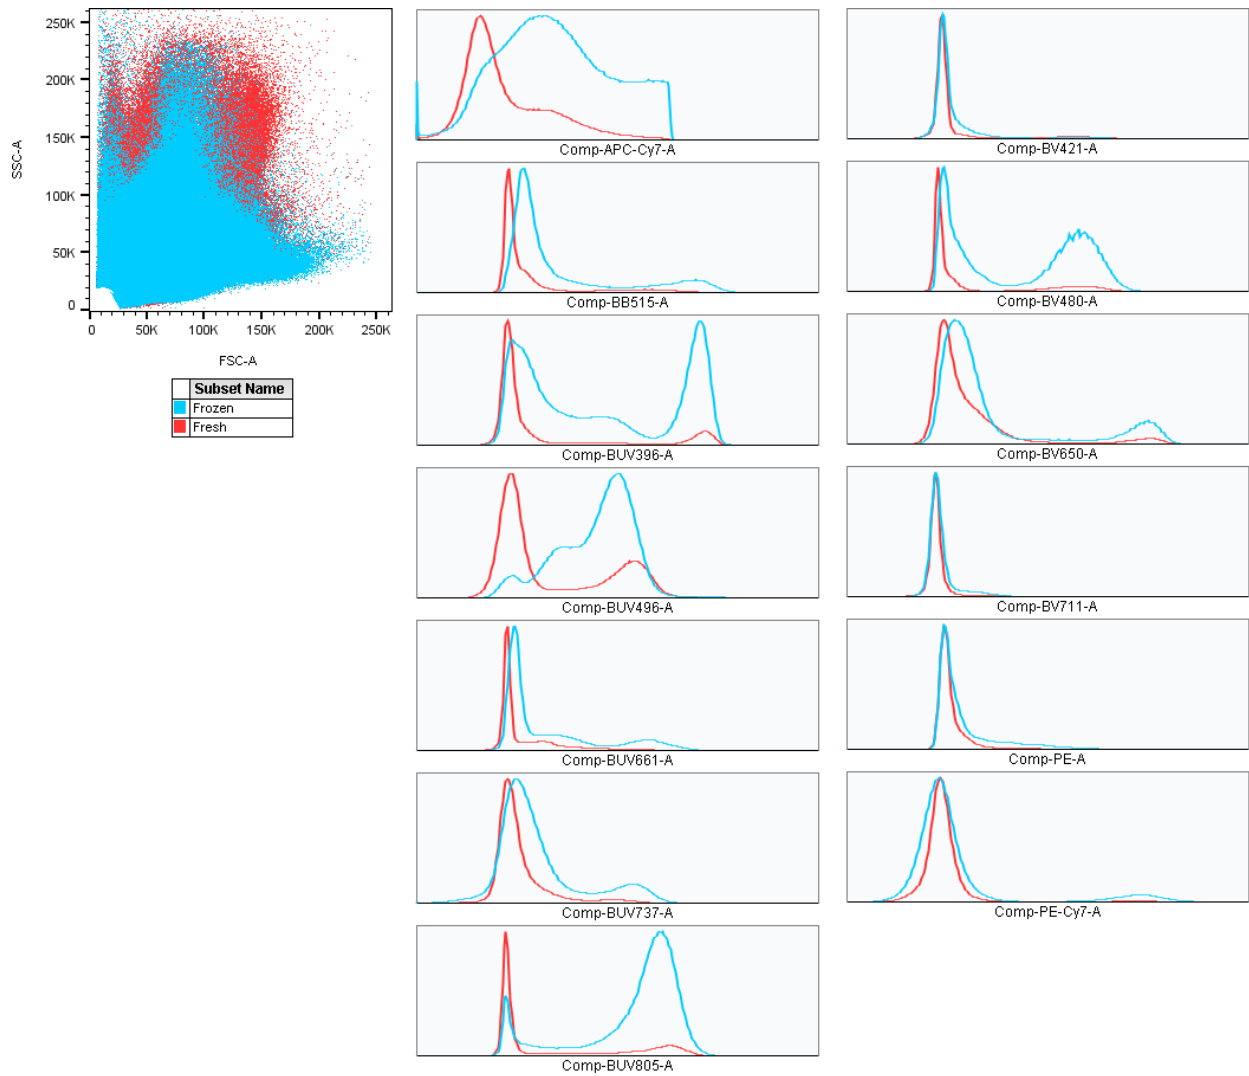

**Supplemental Figure 2: Antigen profiles before and after cryopreservation.** Left: forward scatter by side scatter profiles before (red) and after (blue) cryopreservation. Right: Histograms of each antigen before (red) and after (blue) cryopreservation. This figure represents all events from 12 arterial samples split into two aliquots; one analyzed at time of collection, and another frozen for at least 1 month before analysis.

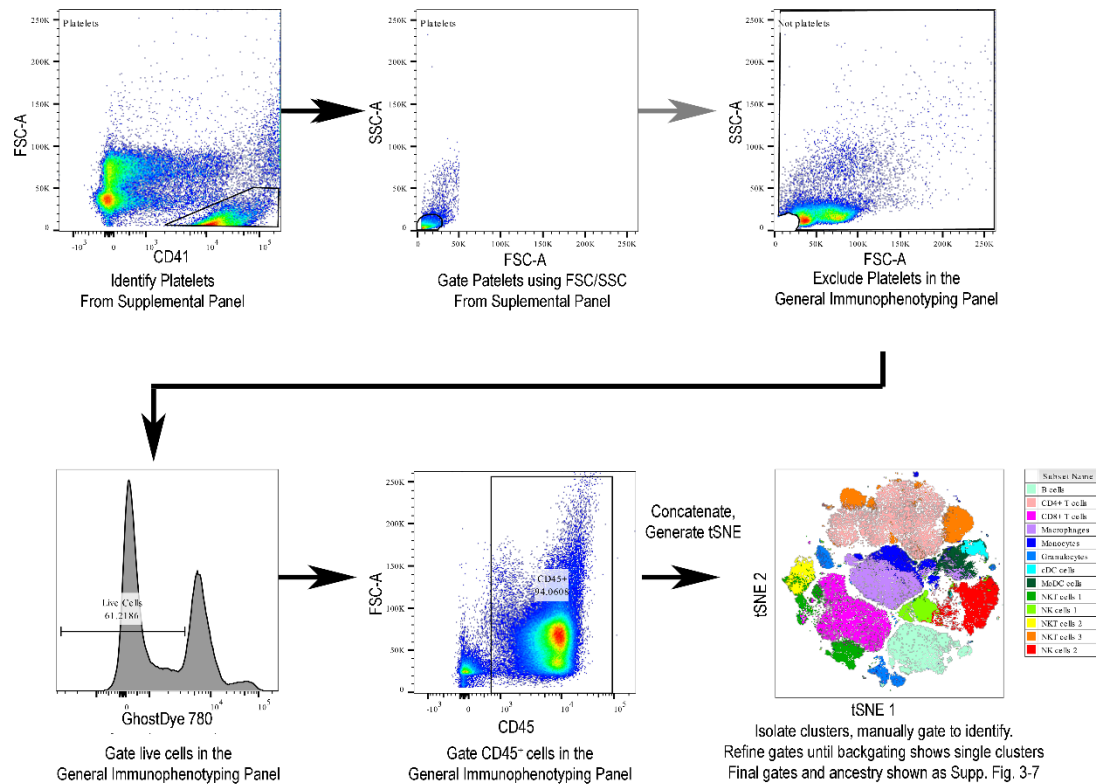

**Supplemental Figure 3: General Immunophenotyping Panel gating strategy.** Briefly, the supplemental panel was used to identify platelets as CD41<sup>+</sup> FSC<sup>low</sup> events, converted to a FSC-A by SSC-A gate, and applied to the full General Immunophenotyping Panel. Dead cells (GhostDye 780<sup>+</sup> events) were excluded, and live cells were gated on CD45 to include only leukocytes. All collected samples were downsampled to 2000 events and concatenated to a single data file. All fluorescent parameters plus FSC-A and SSC-A were used in the tSNE algorithm to generate the final plot.

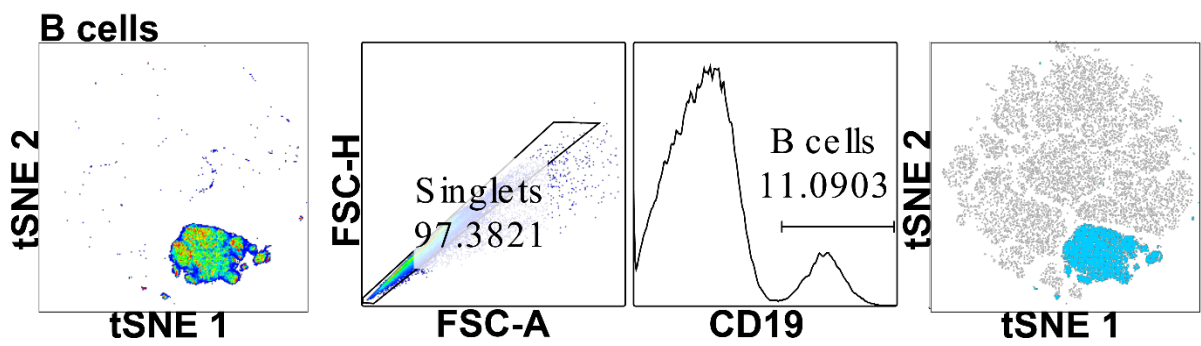

Supplemental Figure 4: B cell gating strategy. B cells were identified as CD19<sup>+</sup>.

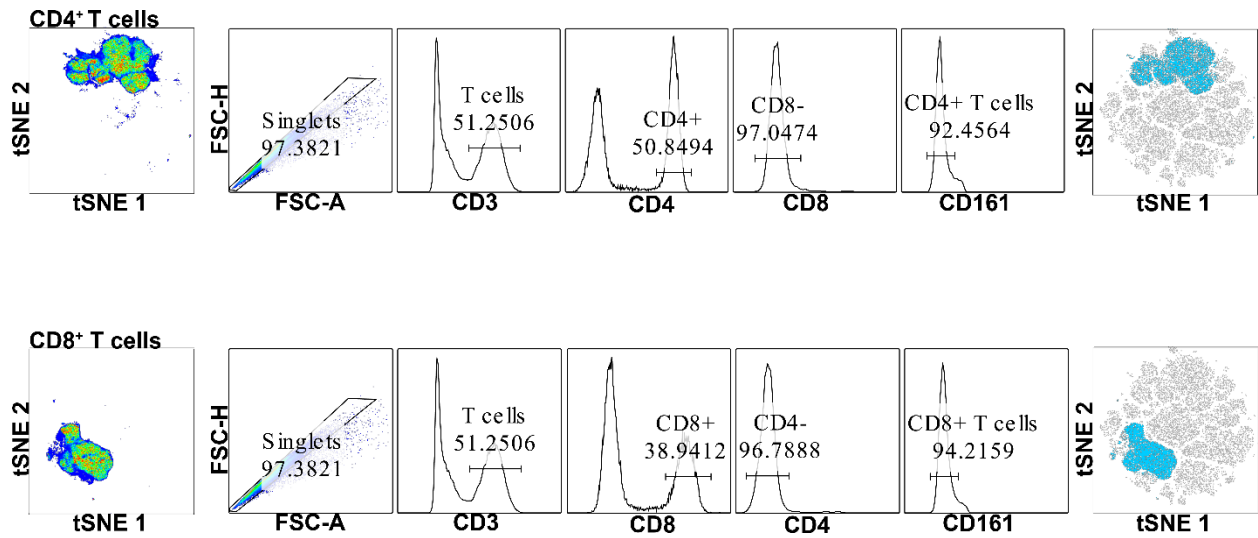

**Supplemental Figure 5: T cell gating strategy.** T cells were identified first as CD3<sup>+</sup>, then as either CD4<sup>+</sup> or CD8<sup>+</sup>, confirmed with the complementary gate, and finally gated as CD161<sup>-</sup>.



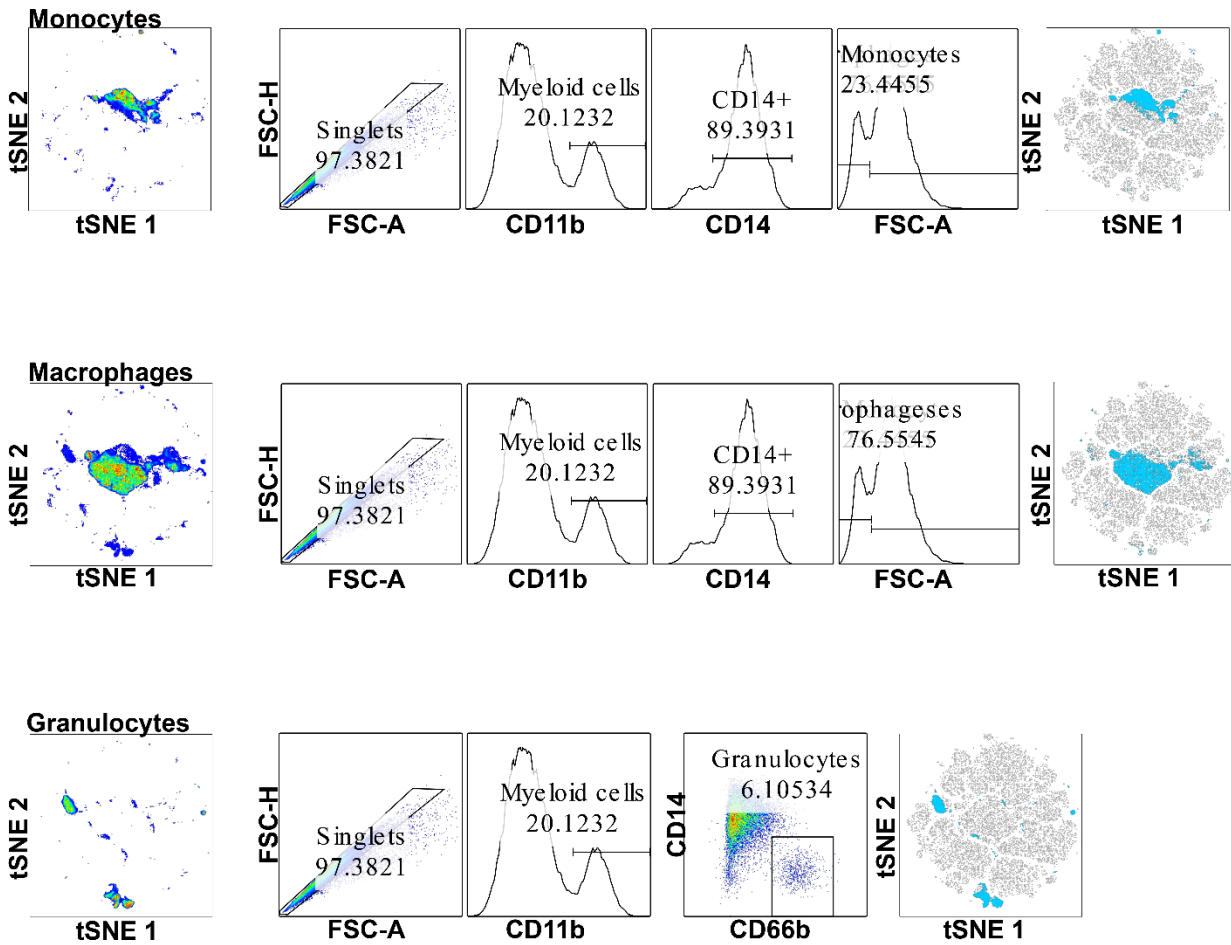

**Supplementary Figure 6: Myeloid cell gating strategy.** Myeloid cells were first identified as CD11b<sup>+</sup>. Monocytes and macrophages were further identified as CD14<sup>+</sup> and distinguished as either FSC-A<sup>low</sup> or FSC-A<sup>high</sup>. Granulocytes were identified as CD66b<sup>+</sup> CD14<sup>low</sup>.

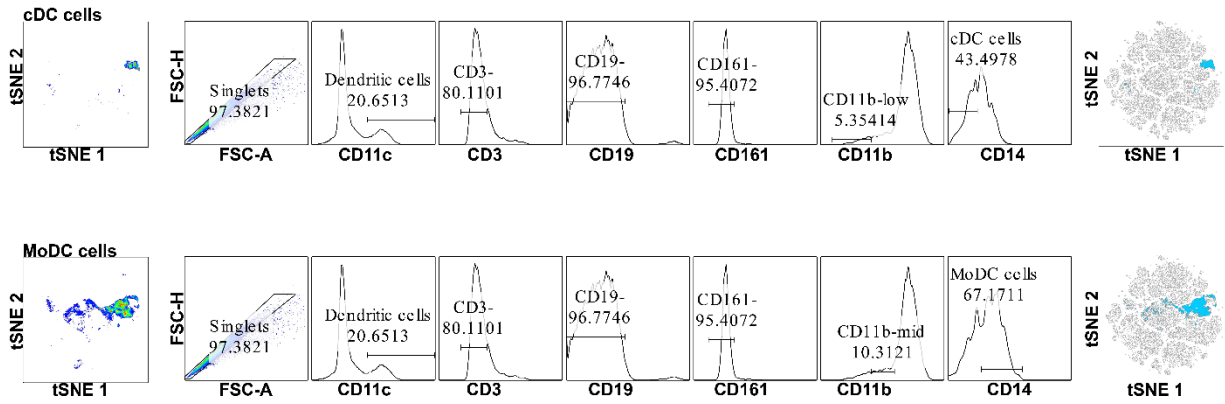

**Supplemental Figure 7: Dendritic cell gating strategy.** Dendritic cells were first identified as CD11c<sup>+</sup>, then confirmed as CD3<sup>-</sup>CD19<sup>-</sup>CD161<sup>-</sup>. Classical dendritic cells (cDCs) were identified as CD11b<sup>low</sup>CD14<sup>-</sup>. Monocyte-derived dendritic cells (MoDCs) were identified as CD11b<sup>mid</sup>CD14<sup>mid</sup>.

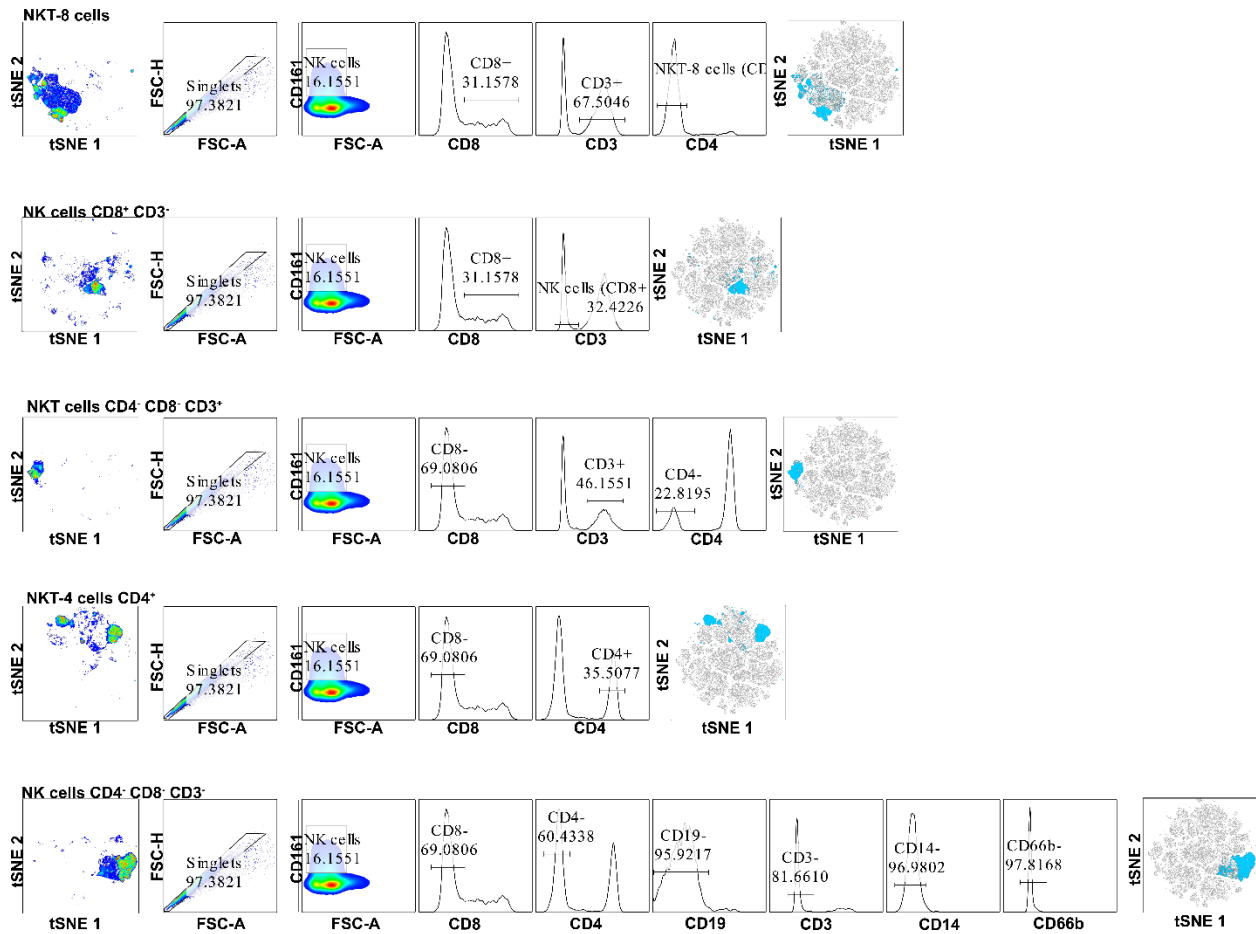

**Supplemental Figure 8: NK-like cell gating strategy.** NK cells were first identified as CD161<sup>+</sup>, then using CD8, CD3, CD4, to subset various NK-like populations. Finally, one NK cell population remained which was negative for everything except CD161.

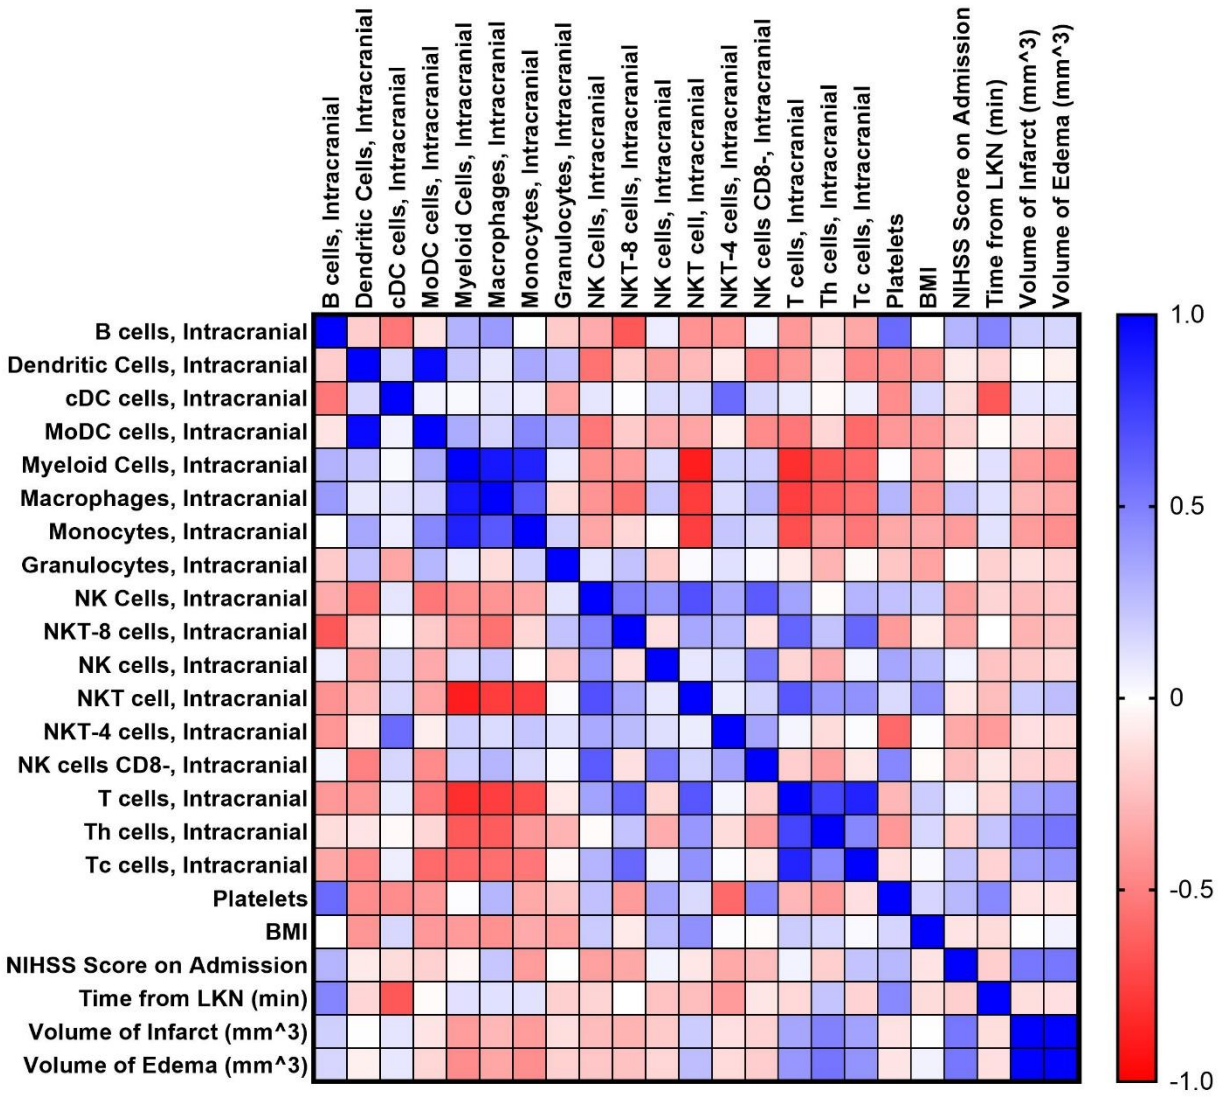

**Supplemental Figure 9. Intracranial Blood Correlation Matrix.** Correlation matrix shows the intensity of a positive (blue) or negative (red) correlation, as defined by the scale on the right. Leukocyte populations were correlated using non-parametric spearman r values to determine within-patient associations with body mass index (BMI), NIH Stroke Scale (NIHSS), time from last known normal (LKN), and volume of infarct and edema.

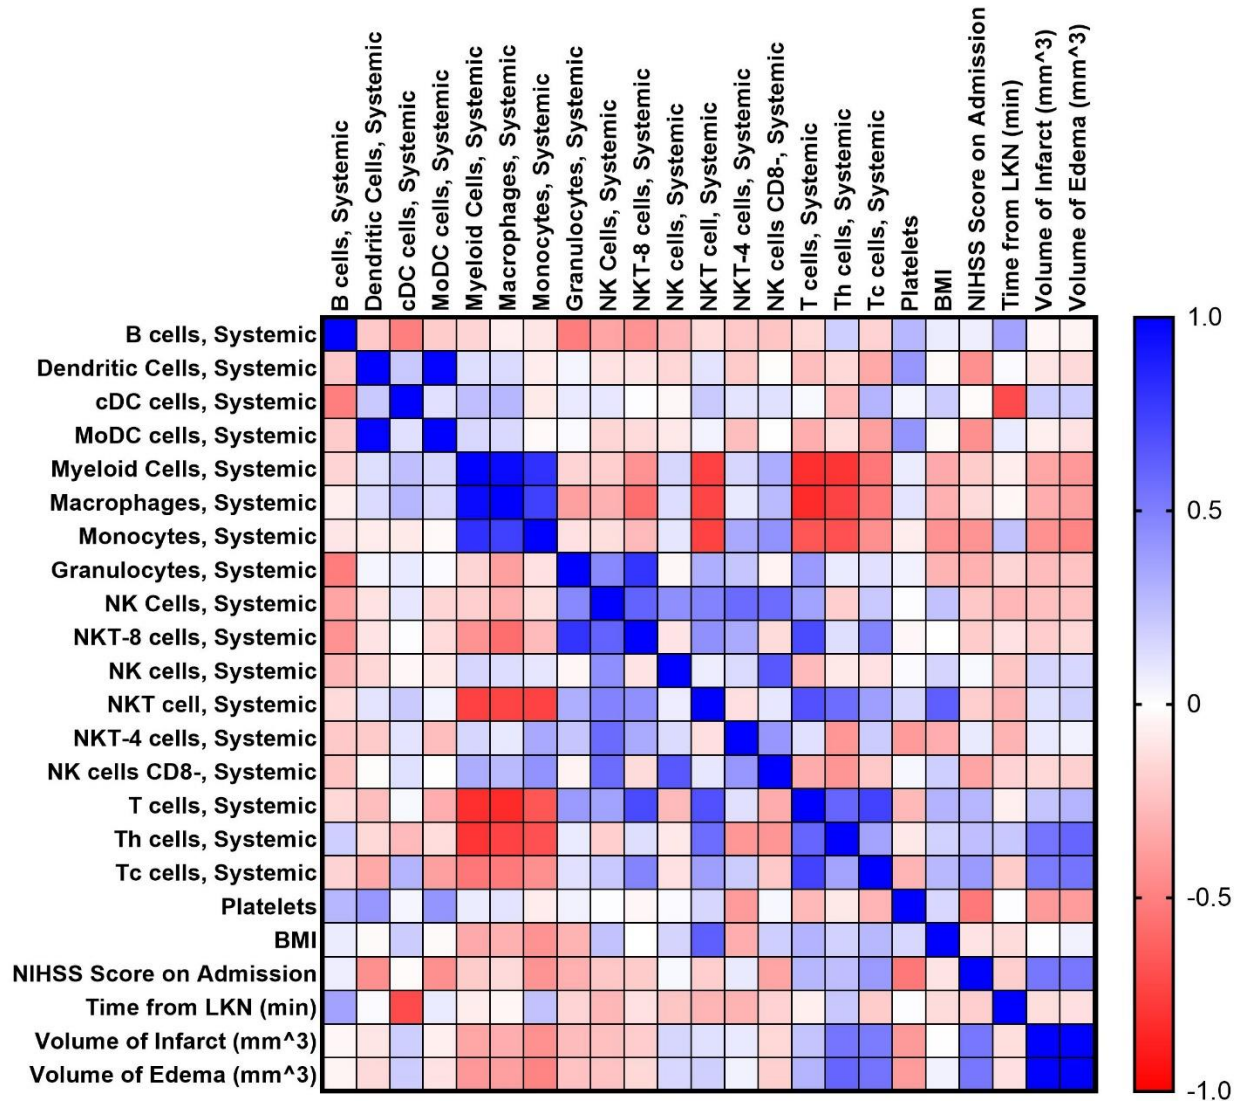

**Supplemental Figure 10. Systemic Blood Correlation Matrix.** Correlation matrix shows the intensity of a positive (blue) or negative (red) correlation, as defined by the scale on the right. Leukocyte populations were correlated using non-parametric spearman r values to determine within-patient associations with body mass index (BMI), NIH Stroke Scale (NIHSS), time from last known normal (LKN), and volume of infarct and edema.

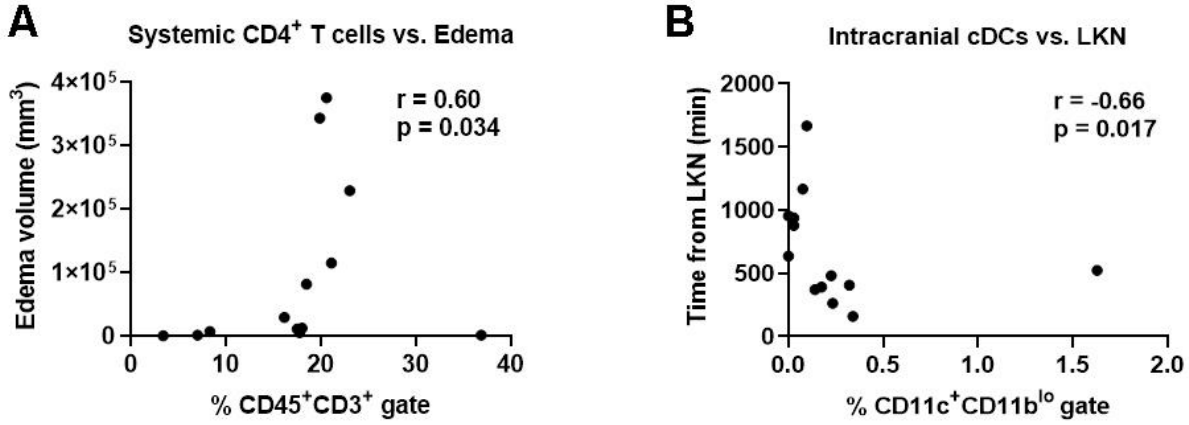

**Supplemental Figure 11. Association of leukocyte subpopulations to within-patient parameters.** (A) Spearman non-parametric correlation found significant association with systemic CD4<sup>+</sup> T cell populations compared to infarct volume. (B) There was also an association between intracranial classical dendritic cell (cDCs) populations compared to time from last known normal (LKN).  $r$  and  $p$  values as shown.

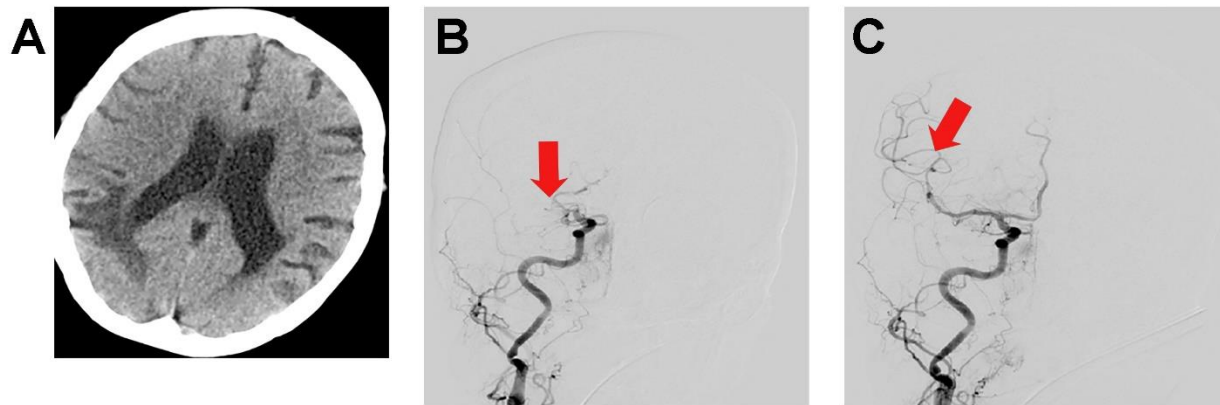

**Supplemental Figure 12: Patient 112 with hemorrhagic transformation.** Patient 112, a 76-year-old woman, presented to a rural hospital as a stroke alert. Patient's primary complaints were left sided weakness, left sided numbness, and speech problems corresponding to NIH Stroke Scale 18. Her medical history included chronic atrial fibrillation with prosthetic mitral valve and warfarin therapy, hypertension, and history of prior stroke with unknown status of residual deficits. Intravenous tissue plasminogen activator (tPA) was given to the patient prior to transfer to the university hospital. Upon arrival, non-contrast computerized tomography (CT) indicated (A) hypodensity in the right middle cerebral artery (rMCA) region indicating an acute infarct. (B, C) The patient immediately underwent mechanical thrombectomy with full reperfusion. Right internal carotid artery (ICA) injection on digitally subtracted angiogram (DSA). Pre-thrombectomy (B) shows an abrupt cut off (red arrow) at the origin in right MCA. Post-thrombectomy (C) shows complete revascularization after mechanical thrombectomy (red arrow). Antiplatelet and atorvastatin therapy was subsequently administered.

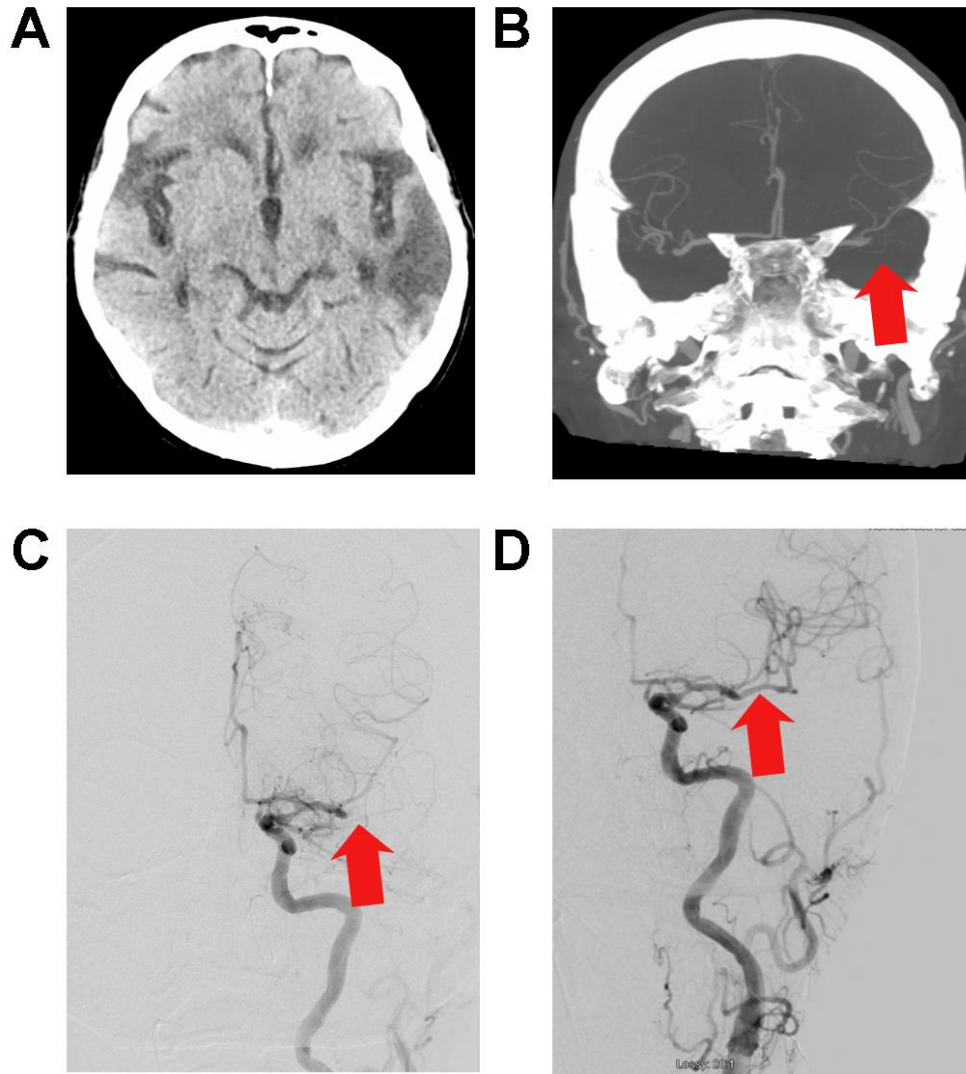

**Supplemental Figure 13: Patient 103 with new occlusion on day 2 of stroke.** Patient 103, an 87-year-old female, also presented to a rural hospital as a stroke alert. Patient's primary complaints were slurred speech, altered mental status, left-sided weakness, and left facial droop corresponding to NIH Stroke Scale 9. Her medical history included atrial fibrillation with rivaroxaban therapy. Intravenous tPA was contraindicated due to rivaroxaban. (A) Initial CT revealed acute hypodensity in the left temporal lobe indicating an acute infarction. angiogram revealed significant atherosclerosis of bilateral carotid arteries. The following day, patient developed new right-sided hemiparesis and facial droop. CT angiogram revealed a new occlusion of the left inferior M2 territory. (B) Cut off in the left M2 inferior division on day 2 (red arrow) led to a (C) pre-thrombectomy left internal carotid injection showing cut off in the left inferior temporal M2 (red arrow). Patient immediately underwent mechanical thrombectomy with complete reperfusion. (D) Post-thrombectomy angiogram shows recanalization of left M2 (red arrow).
